# Supplementary material
Source: PubMed Central journal article supplement (PMC8585695)
Supplement: NIHMS1739933-supplement-supinfo.pdf [file NIHMS1739933-supplement-supinfo.pdf]

**Table S1.** Antibodies used for immunoblotting.

| Target               | Catalog #              | Dilution |
|----------------------|------------------------|----------|
| pErk1/2              | CST 9101               | 1:2000   |
| Erk1/2               | CST 4965               | 1:2000   |
| pAkt (S473)          | CST 4060               | 1:1000   |
| Akt                  | CST 9272               | 1:1000   |
| Cyclin D1            | CST 2978               | 1:1000   |
| Cyclin E1            | CST 20808              | 1:1000   |
| Cyclin B1            | CST 4138               | 1:1000   |
| p19Arf               | sc-32748               | 1:500    |
| p53                  | CST 2524               | 1:1000   |
| p21Waf1/Cip1         | sc-397                 | 1:1000   |
| HSP90                | CST 4877               | 1:2000   |
| ROCK1 (H-85)         | sc-5560                | 1:500    |
| ROCK2 (C-20)         | sc-1891                | 1:500    |
| I $\kappa$ B $\zeta$ | Invitrogen #14-6801-82 | 1:1000   |
| p65                  | CST 8242               | 1:1000   |
| Lamin A/C            | CST 4777               | 1:1000   |
| K1                   | BioLegend #905201      | 1:2000   |
| K10                  | BioLegend #905404      | 1:1000   |
| K14                  | BioLegend #905304      | 1:10000  |
| $\beta$ -Actin       | CST 4970               | 1:1000   |
| Histone H3           | ab17921                | 1:10000  |
| Smad3                | CST 9523               | 1:1000   |
| p-Smad3              | CST 9520               | 1:1000   |

**Table S2.** Sequences of custom primers for quantitative reverse transcription polymerase chain reaction (qRT-PCR).

| Gene                                  | Forward                  | Reverse                   |
|---------------------------------------|--------------------------|---------------------------|
| <i>Gapdh</i>                          | CATGGCCTTCCGTGTTCTTA     | GCGGCACGTCAGATCCA         |
| <i>Cdkn2b</i> (p15 <sup>Ink4b</sup> ) | CCCTGCCACCTTACCAGA       | CAGATACCTCGCAATGTCACG     |
| <i>Il1a</i>                           | CAAAGTATGAAGCTCGTCA      | TCTCCTTGAGCGCTCACGAA      |
| <i>Csf2</i>                           | GCCATCAAAGAAGCCCTGAA     | GCGGGTCTGCACACATGTTA      |
| <i>Csf3</i>                           | TCTGCCCCGAAGCTTCTGCTTAAG | CAGCAACACCAGCTCCTCGGGGTGA |

**Table S3.** Data from cytokine array analysis.

|                 | Ras1/C1 | Ras3/C1 | Ras3/C3 | RasY1/Ras1 | RasY3/Ras3 |
|-----------------|---------|---------|---------|------------|------------|
| Pro-MMP-9       | 10.76   | 15.01   | 7.50    | 0.58       | 0.16       |
| GM-CSF          | 7.02    | 10.22   | 17.12   | 0.26       | 0.45       |
| Thymus CK-1     | 6.59    | 10.39   | 6.00    | 0.55       | 0.73       |
| Decorin         | 5.94    | 7.47    | 1.50    | 1.22       | 0.72       |
| KC              | 4.51    | 5.98    | 4.76    | 0.81       | 0.88       |
| MIP-1-gamma     | 3.77    | 2.55    | 0.57    | 0.98       | 0.89       |
| IL3             | 3.34    | 5.03    | 6.91    | 0.39       | 0.27       |
| MIP-3-alpha     | 2.85    | 1.55    | 4.46    | 0.89       | 1.77       |
| IGFBP-2         | 2.60    | 1.66    | 1.64    | 1.08       | 1.75       |
| MMP-2           | 2.45    | 3.22    | 5.63    | 1.27       | 0.54       |
| MMP-3           | 2.24    | 5.40    | 7.36    | 1.10       | 0.67       |
| LIX             | 2.20    | 3.09    | 2.27    | 0.78       | 0.78       |
| G-CSF           | 2.17    | 3.41    | 4.46    | 0.58       | 0.38       |
| IGF-BP-3        | 1.96    | 2.33    | 2.85    | 0.95       | 0.79       |
| CXCL16          | 1.85    | 1.81    | 3.83    | 0.89       | 0.97       |
| Galectin-1      | 1.70    | 1.66    | 2.21    | 0.67       | 0.49       |
| Osteoprotegerin | 1.48    | 1.75    | 2.10    | 0.87       | 0.27       |
| Osteopontin     | 1.40    | 3.32    | 4.55    | 1.04       | 0.58       |
| TSLP            | 1.29    | 1.65    | 2.99    | 0.92       | 1.64       |
| MDC             | 1.18    | 1.73    | 1.41    | 1.31       | 0.70       |
| GITR            | 1.16    | 2.19    | 1.36    | 1.16       | 0.70       |
| E-Selectin      | 1.16    | 1.73    | 1.07    | 1.16       | 0.70       |
| TWEAK R         | 1.13    | 2.91    | 4.81    | 0.35       | 0.16       |
| VEGF R2         | 1.12    | 1.73    | 1.11    | 1.40       | 0.44       |
| E-Cadherin      | 1.06    | 1.44    | 2.15    | 1.04       | 1.63       |
| MCP-1           | 0.93    | 2.77    | 2.20    | 1.64       | 0.49       |
| sTNF RII        | 0.66    | 0.34    | 0.89    | 1.16       | 0.94       |
| MIP-1-alpha     | 0.64    | 0.32    | 0.89    | 1.04       | 1.25       |
| SDF-1-alpha     | 0.59    | 0.39    | 1.02    | 1.52       | 0.71       |
| TARC            | 0.58    | 0.55    | 1.49    | 1.80       | 0.56       |

Proteins released by keratinocytes in cell culture supernatant were detected using Cytokine Arrays from Ray Bioscience. Proteins sorted by most increased by RAS to most decreased by RAS and how those proteins are affected by Y-27632 treatment on RAS-keratinocytes. Data presented are ratios between the two groups. Protein names colored in blue indicate reported SASPs. C are control keratinocytes. Numbers in the headings indicate weeks of treatment.

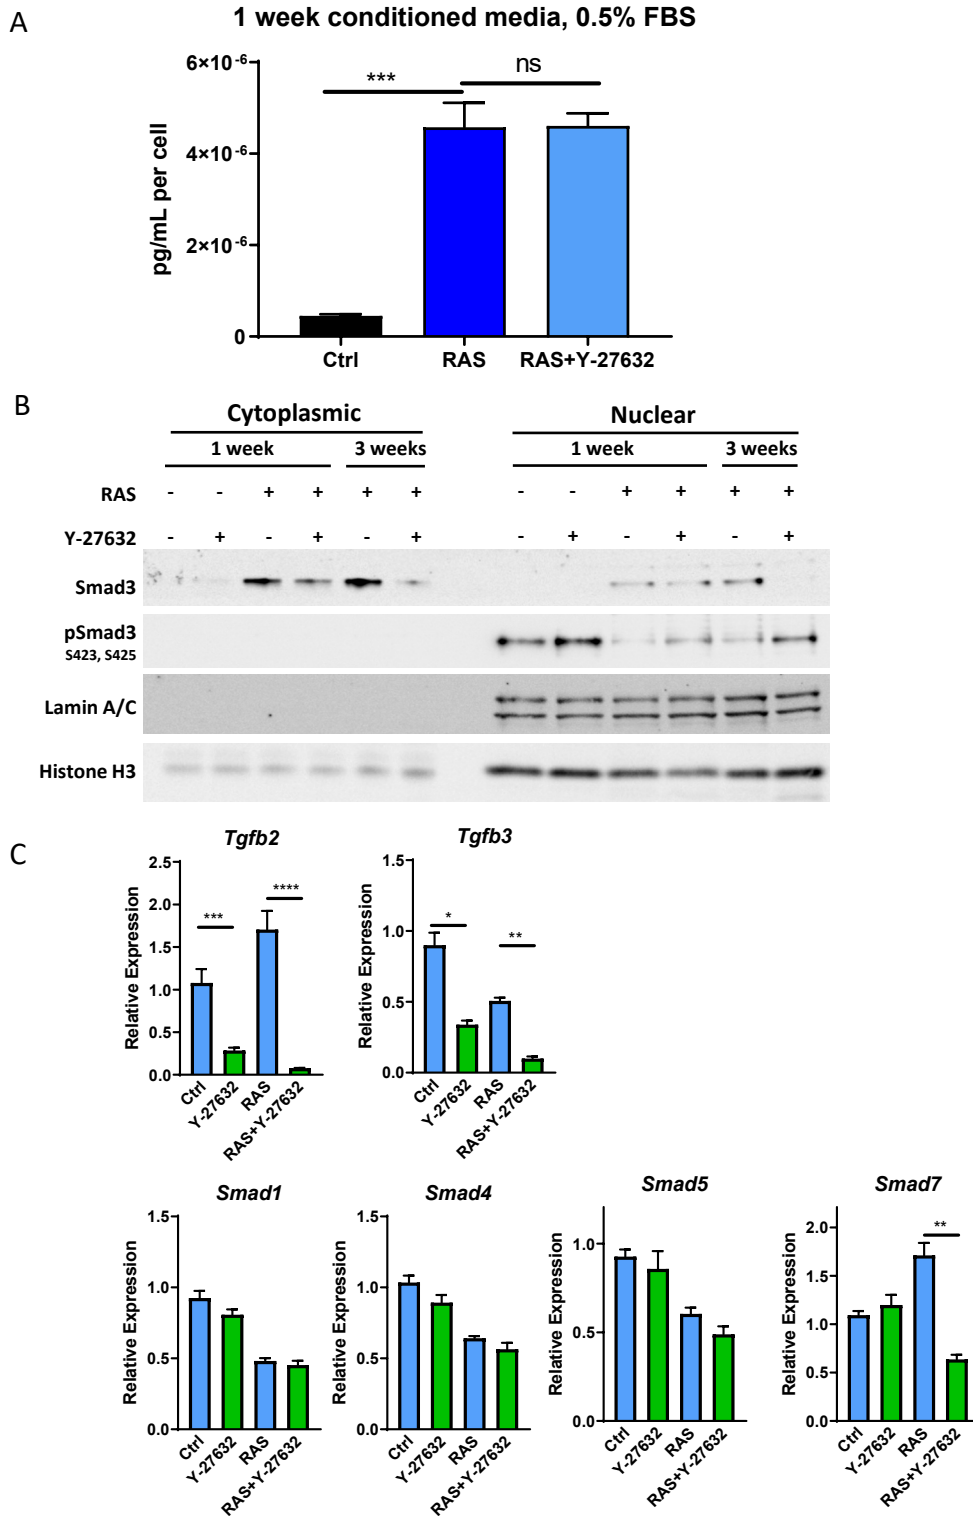

**Supplemental figure S1** (A) TGF- $\beta$ 1 ELISA. Supernatants from one-week cultured cells were collected and analyzed for TGF- $\beta$  using an Elisa kit from R&D. Results were normalized by total cell count as determined by Hoechst staining. (B) Immunoblotting for Smad3 and phospho-Smad3 in subcellular compartments of keratinocytes. (C) RT-qPCR analysis of TGF- $\beta$  regulated genes from one-week cultured keratinocytes treated as shown. \*  $p < 0.05$ , \*\*  $p < 0.01$ , \*\*\*  $p < 0.005$ , \*\*\*\*  $p < 0.001$
